# Supplementary material for: Fine mapping and conditional analysis identify a new mutation in the autoimmunity susceptibility gene BLK that leads to reduced half-life of the BLK protein
Source: PubMed Central journal article supplement — Ann Rheum Dis. 2012 Jul 1;71(7):1219–26. doi: 10.1136/annrheumdis-2011-200987 (PMC3375585; doi:10.1136/annrheumdis-2011-200987), 2012-07-01
Supplement: ard-71-7-1219-s1.pdf [file ard-71-7-1219-s1.pdf]

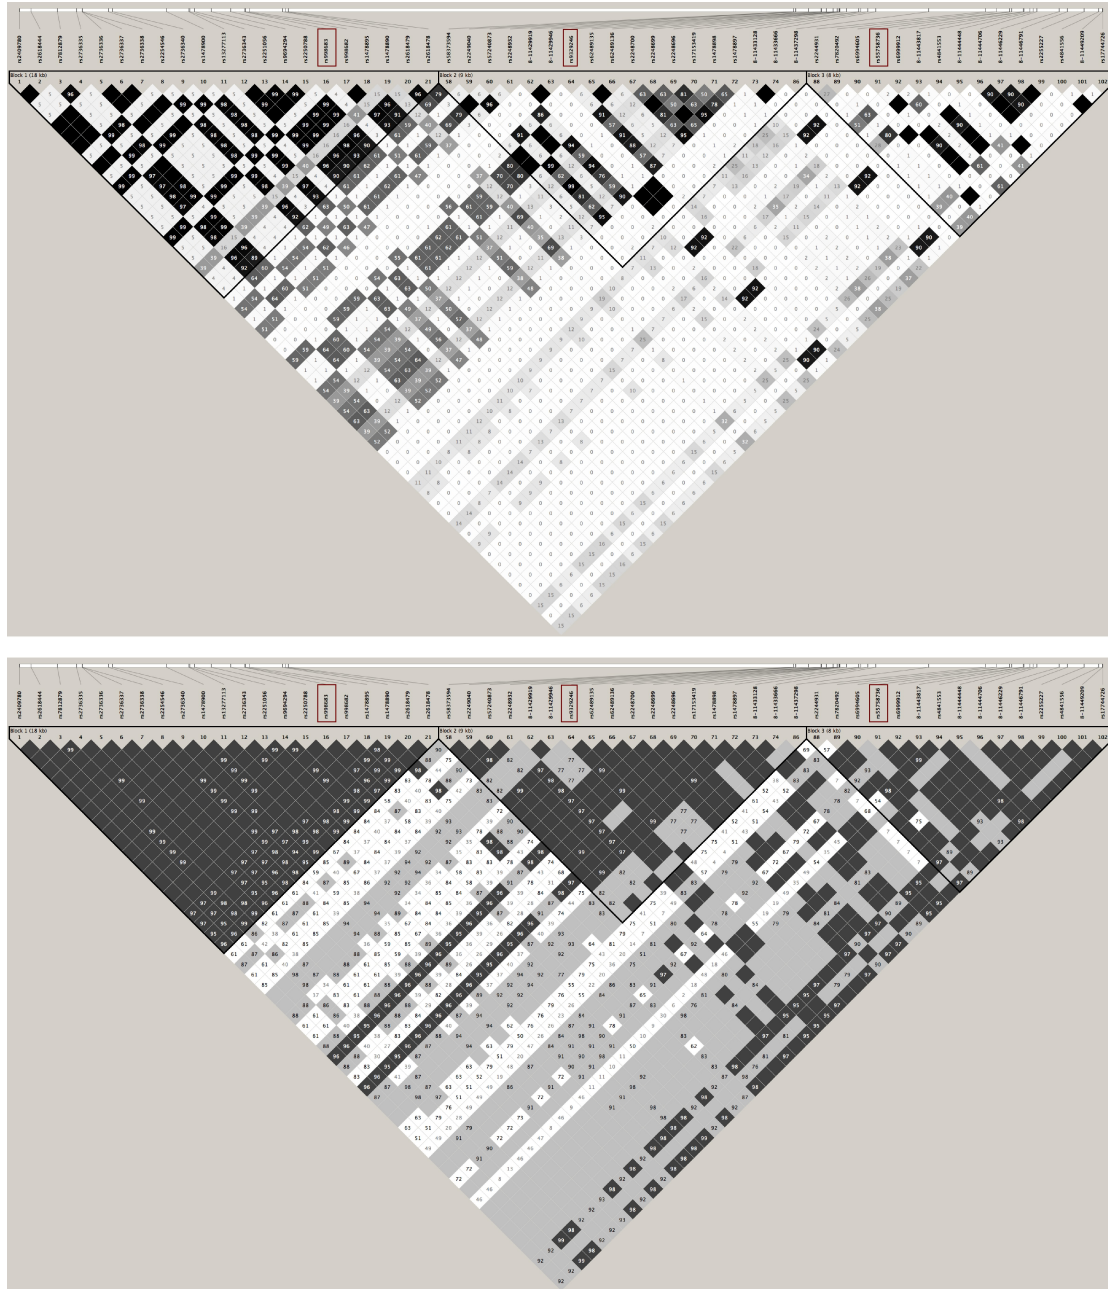

**Figure S1.** Linkage disequilibrium (LD) plots of the three blocks of BLK associated with systemic lupus erythematosus. The haplotype window analysis defined three gene regions that coincide with three haplotype blocks in the *BLK* locus. The blocks were defined using the “Solid Spine of LD” method implemented in Haploview version 4.1. For clarity, only the SNPs comprised within the associated blocks are displayed and the LD values between them in terms of  $r^2$  (top) and  $D'$  values (bottom) are shown. The representative SNPs of each block are enclosed in red rectangles.

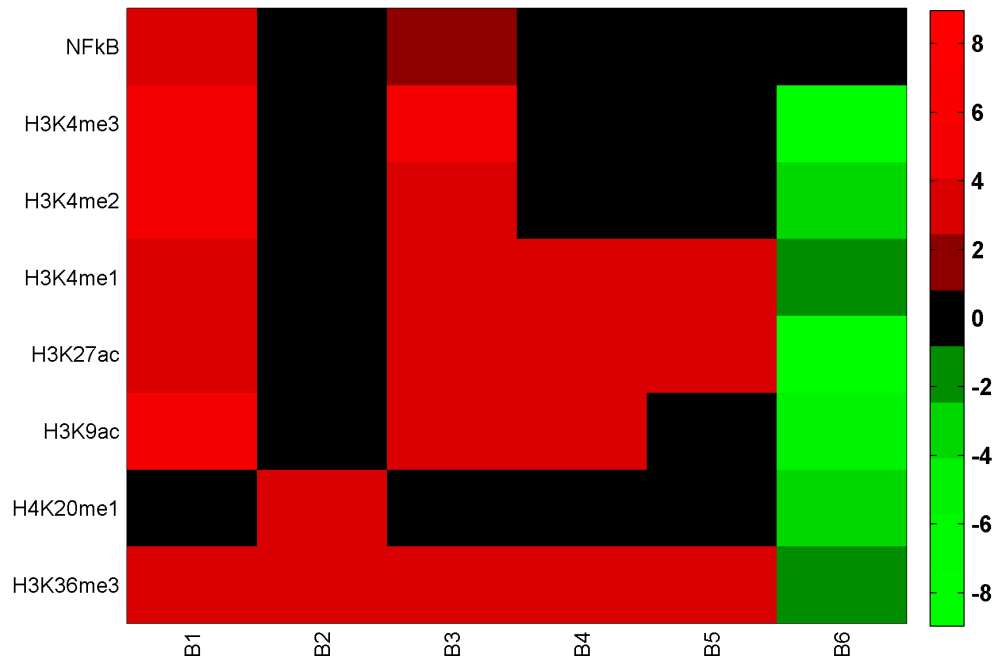

*Figure S2.* Heat map of  $-\log_{10}$  p-values of enrichment of transcription factor binding sites and genomic features within haplotype block SNPs. Green/Red gradients indicate the level of under-/over-representation of the enrichment, respectively. Overall, associated regions (B1, B3) were enriched in genomic features while not associated regions were either not enriched or under-represented in these genomic features.

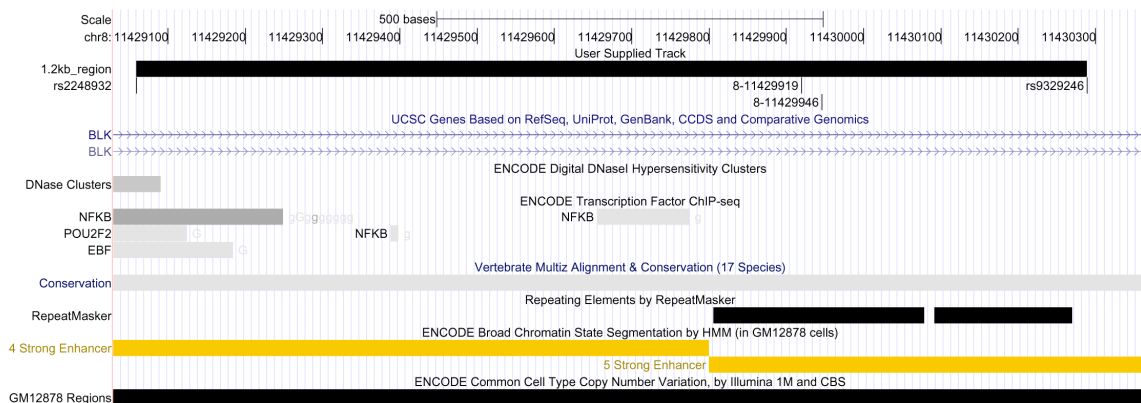

**Figure S3. Schematic description of the best-associated haplotype window.** The 1.2Kb genomic section tracks extracted from UCSC genome database showing the features identified in this segment. A strong NFkB site lies precisely under SNP rs2248932. The region includes also two strong enhancer elements.

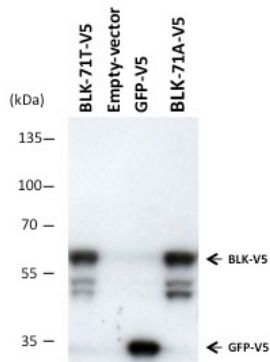

**Figure S4. Detection specificity of the constructs targeted with the epitope tag V5.** Extracts from cells transfected with different constructs were interrogated with anti-mouse V5 antibody (Invitrogen). The BLK variants targeted with V5 at the C-terminal show specific bands at the expected size (60 kDa). Two minor bands probably representing posttranslational modifications are also visible at lower molecular weight. A construct expressing the GFP protein targeted with V5 (positive control) shows a single band at the expected size (29 kDa).



**Table S1** Association analysis of *BLK* single-nucleotide polymorphisms with systemic lupus erythematosus

| SNP           | Position* | Allele 1 /<br>Allele 2 | Frequency<br>allele 1<br>cases | Frequency<br>allele 1<br>controls | OR** | L95  | U95  | $P_{CMH}$       | $P_{CMH-corrected}$ | $P_{Breslow-Day}$ |
|---------------|-----------|------------------------|--------------------------------|-----------------------------------|------|------|------|-----------------|---------------------|-------------------|
| rs2409780     | 11374997  | C/T                    | 0.3070                         | 0.2532                            | 1.35 | 1.18 | 1.54 | <b>8.09E-06</b> | <b>1.16E-04</b>     | 0.9879            |
| rs2618444     | 11375780  | C/A                    | 0.3070                         | 0.2532                            | 1.35 | 1.18 | 1.54 | <b>8.09E-06</b> | <b>1.16E-04</b>     | 0.9879            |
| rs7812879     | 11377591  | T/C                    | 0.1212                         | 0.1242                            | 0.96 | 0.80 | 1.15 | 0.6823          | 0.7985              | 0.0835            |
| rs2736335     | 11378897  | A/G                    | 0.1145                         | 0.1187                            | 0.94 | 0.78 | 1.14 | 0.5464          | 0.6851              | 0.0996            |
| rs2736336     | 11379280  | T/G                    | 0.3075                         | 0.2530                            | 1.36 | 1.19 | 1.55 | <b>5.89E-06</b> | <b>1.05E-04</b>     | 0.9881            |
| rs2736337     | 11379290  | C/T                    | 0.3075                         | 0.2530                            | 1.36 | 1.19 | 1.55 | <b>5.89E-06</b> | <b>1.05E-04</b>     | 0.9881            |
| rs2736338     | 11379293  | C/A                    | 0.3050                         | 0.2491                            | 1.36 | 1.19 | 1.56 | <b>5.06E-06</b> | <b>1.05E-04</b>     | 0.9757            |
| rs2254546     | 11381089  | A/G                    | 0.1184                         | 0.1198                            | 0.98 | 0.82 | 1.18 | 0.8389          | 0.9079              | 0.0516            |
| rs2736340     | 11381382  | T/C                    | 0.3019                         | 0.2477                            | 1.36 | 1.19 | 1.55 | <b>3.73E-06</b> | <b>1.05E-04</b>     | 0.9672            |
| rs1478900     | 11385069  | C/T                    | 0.1196                         | 0.1200                            | 0.99 | 0.83 | 1.19 | 0.9288          | 0.9654              | 0.0619            |
| rs13277113    | 11386595  | A/G                    | 0.2978                         | 0.2442                            | 1.36 | 1.19 | 1.55 | <b>3.84E-06</b> | <b>1.05E-04</b>     | 0.9448            |
| rs2736343     | 11386659  | C/T                    | 0.1194                         | 0.1210                            | 0.98 | 0.82 | 1.17 | 0.8063          | 0.9035              | 0.1305            |
| rs2251056     | 11386985  | C/A                    | 0.1194                         | 0.1210                            | 0.98 | 0.82 | 1.17 | 0.8063          | 0.9035              | 0.1305            |
| rs9694294     | 11388130  | C/G                    | 0.1194                         | 0.1202                            | 0.99 | 0.82 | 1.18 | 0.8773          | 0.9180              | 0.0685            |
| rs2250788     | 11389465  | A/G                    | 0.1197                         | 0.1210                            | 0.98 | 0.82 | 1.17 | 0.8247          | 0.9049              | 0.1331            |
| rs998683      | 11390409  | A/G                    | 0.2914                         | 0.2370                            | 1.38 | 1.21 | 1.58 | <b>2.12E-06</b> | <b>1.05E-04</b>     | 0.9426            |
| rs998682      | 11390461  | A/G                    | 0.1182                         | 0.1174                            | 1.00 | 0.83 | 1.21 | 0.9713          | 0.9817              | 0.0402            |
| rs1478895     | 11390744  | G/C                    | 0.1205                         | 0.1176                            | 1.03 | 0.85 | 1.23 | 0.7843          | 0.8915              | 0.0345            |
| rs1478890     | 11393011  | C/G                    | 0.4978                         | 0.4456                            | 1.27 | 1.13 | 1.42 | <b>6.46E-05</b> | <b>6.38E-04</b>     | 0.7613            |
| rs2618479     | 11393230  | A/G                    | 0.1132                         | 0.1155                            | 1.00 | 0.83 | 1.21 | 0.9755          | 0.9817              | 0.0909            |
| rs2618478     | 11393411  | C/A                    | 0.0975                         | 0.0966                            | 1.02 | 0.84 | 1.25 | 0.8181          | 0.9039              | 0.0077            |
| rs10100215    | 11399681  | T/G                    | 0.3088                         | 0.2754                            | 1.17 | 1.03 | 1.33 | <b>0.0151</b>   | <b>0.0398</b>       | 0.4466            |
| rs2618461     | 11403101  | C/T                    | 0.0108                         | 0.0048                            | 2.10 | 1.04 | 4.22 | <b>0.0348</b>   | 0.0734              | NA                |
| rs11997711    | 11403312  | G/A                    | 0.0048                         | 0.0024                            | 1.69 | 0.64 | 4.49 | 0.2800          | 0.3881              | NA                |
| rs2736353     | 11404447  | C/T                    | 0.1238                         | 0.1302                            | 0.95 | 0.80 | 1.14 | 0.6016          | 0.7378              | 0.3771            |
| rs2252729     | 11405628  | A/G                    | 0.1264                         | 0.1376                            | 0.90 | 0.76 | 1.07 | 0.2467          | 0.3512              | 0.2377            |
| rs2736354     | 11406140  | T/C                    | 0.1273                         | 0.1405                            | 0.89 | 0.75 | 1.06 | 0.1943          | 0.2894              | 0.3240            |
| rs2618458     | 11406477  | A/G                    | 0.1264                         | 0.1390                            | 0.89 | 0.75 | 1.06 | 0.1860          | 0.2854              | 0.2805            |
| rs2618457     | 11406586  | A/G                    | 0.1264                         | 0.1390                            | 0.89 | 0.75 | 1.06 | 0.1860          | 0.2854              | 0.2805            |
| rs4841545     | 11406645  | C/G                    | 0.3512                         | 0.3782                            | 0.84 | 0.74 | 0.94 | <b>3.76E-03</b> | <b>0.0135</b>       | 0.9525            |
| rs2736355     | 11407186  | T/C                    | 0.1321                         | 0.1422                            | 0.92 | 0.77 | 1.09 | 0.3176          | 0.4252              | 0.2391            |
| rs6993775     | 11407398  | G/T                    | 0.1393                         | 0.1497                            | 0.91 | 0.77 | 1.08 | 0.2762          | 0.3862              | 0.1938            |
| rs2618456     | 11408142  | G/C                    | 0.1216                         | 0.1348                            | 0.88 | 0.74 | 1.05 | 0.1662          | 0.2679              | 0.2700            |
| rs2618455     | 11408287  | A/G                    | 0.1218                         | 0.1383                            | 0.86 | 0.73 | 1.03 | 0.0959          | 0.1629              | 0.3105            |
| rs12674768    | 11408956  | T/C                    | 0.2691                         | 0.2371                            | 1.23 | 1.07 | 1.41 | <b>2.66E-03</b> | <b>0.0108</b>       | 0.6036            |
| rs11990277    | 11409494  | C/T                    | 0.2747                         | 0.2416                            | 1.24 | 1.08 | 1.41 | <b>1.73E-03</b> | <b>8.39E-03</b>     | 0.7194            |
| rs2736359     | 11409508  | A/G                    | 0.1189                         | 0.1283                            | 0.92 | 0.77 | 1.10 | 0.3578          | 0.4751              | 0.3672            |
| rs11250142    | 11409942  | G/A                    | 0.1190                         | 0.1275                            | 0.93 | 0.78 | 1.12 | 0.4627          | 0.5944              | 0.2411            |
| rs12677903    | 11410046  | C/T                    | 0.2751                         | 0.2418                            | 1.24 | 1.09 | 1.42 | <b>1.54E-03</b> | <b>8.08E-03</b>     | 0.6958            |
| rs17153385    | 11410673  | T/C                    | 0.0979                         | 0.1032                            | 0.96 | 0.79 | 1.17 | 0.7018          | 0.8153              | 0.3358            |
| rs4841546     | 11411516  | T/C                    | 0.2738                         | 0.2409                            | 1.24 | 1.08 | 1.41 | <b>1.95E-03</b> | <b>9.07E-03</b>     | 0.6835            |
| chr8:11411637 | 11411637  | T/C                    | 0.1180                         | 0.1276                            | 0.92 | 0.77 | 1.11 | 0.3886          | 0.5116              | 0.4169            |
| rs55903839    | 11411696  | G/A                    | 0.0197                         | 0.0173                            | 1.21 | 0.78 | 1.88 | 0.4173          | 0.5404              | 0.1115            |
| rs2618450     | 11414199  | A/G                    | 0.2474                         | 0.2393                            | 1.08 | 0.94 | 1.23 | 0.2900          | 0.3950              | 0.6808            |
| rs2729940     | 11419776  | A/G                    | 0.4360                         | 0.4017                            | 1.19 | 1.06 | 1.34 | <b>3.96E-03</b> | <b>0.0136</b>       | 0.3732            |
| rs2252797     | 11420068  | G/C                    | 0.3867                         | 0.4255                            | 0.81 | 0.72 | 0.91 | <b>4.71E-04</b> | <b>4.01E-03</b>     | 0.4680            |
| chr8:11421060 | 11421060  | C/T                    | 0.0052                         | 0.0108                            | 0.46 | 0.22 | 0.94 | <b>0.0292</b>   | 0.0640              | NA                |
| chr8:11421946 | 11421946  | C/T                    | 0.0061                         | 0.0108                            | 0.55 | 0.28 | 1.09 | 0.0820          | 0.1456              | NA                |
| rs2618443     | 11421965  | T/C                    | 0.4719                         | 0.4289                            | 1.22 | 1.09 | 1.37 | <b>8.32E-04</b> | <b>5.94E-03</b>     | 0.3692            |
| chr8:11422004 | 11422004  | T/C                    | 0.0061                         | 0.0108                            | 0.55 | 0.28 | 1.09 | 0.0820          | 0.1456              | NA                |
| chr8:11422232 | 11422232  | A/T                    | 0.0061                         | 0.0108                            | 0.55 | 0.28 | 1.09 | 0.0820          | 0.1456              | NA                |
| rs11250144    | 11423685  | C/G                    | 0.3218                         | 0.2856                            | 1.23 | 1.08 | 1.40 | <b>1.68E-03</b> | <b>8.39E-03</b>     | 0.9429            |
| rs2249275     | 11425691  | T/C                    | 0.0111                         | 0.0059                            | 1.78 | 0.91 | 3.47 | 0.0910          | 0.1563              | NA                |
| rs2264866     | 11426062  | T/C                    | 0.3313                         | 0.3456                            | 0.90 | 0.80 | 1.02 | 0.0899          | 0.1563              | 0.1470            |
| chr8:11426473 | 11426473  | A/G                    | 0.0065                         | 0.0108                            | 0.60 | 0.31 | 1.16 | 0.1199          | 0.1974              | NA                |
| chr8:11426486 | 11426486  | T/G                    | 0.0065                         | 0.0108                            | 0.60 | 0.31 | 1.16 | 0.1199          | 0.1974              | NA                |
| rs4841550     | 11426633  | C/G                    | 0.4351                         | 0.4557                            | 0.88 | 0.79 | 0.99 | <b>0.0388</b>   | 0.0766              | 0.9930            |
| rs58373594    | 11428036  | T/A                    | 0.1015                         | 0.1022                            | 1.02 | 0.84 | 1.25 | 0.8178          | 0.9039              | 0.1569            |
| rs2249040     | 11428188  | A/T                    | 0.3967                         | 0.3417                            | 1.32 | 1.17 | 1.49 | <b>5.98E-06</b> | <b>1.05E-04</b>     | 0.9349            |
| rs57240873    | 11428190  | G/C                    | 0.1011                         | 0.1022                            | 1.02 | 0.84 | 1.25 | 0.8386          | 0.9079              | 0.1505            |
| rs2248932     | 11429059  | A/G                    | 0.3970                         | 0.3452                            | 1.30 | 1.15 | 1.47 | <b>1.84E-05</b> | <b>2.23E-04</b>     | 0.9507            |
| chr8:11429919 | 11429919  | T/C                    | 0.0065                         | 0.0114                            | 0.55 | 0.29 | 1.06 | 0.0680          | 0.1279              | NA                |
| chr8:11429946 | 11429946  | C/A                    | 0.0065                         | 0.0114                            | 0.55 | 0.29 | 1.06 | 0.0680          | 0.1279              | NA                |
| rs9329246     | 11430289  | C/T                    | 0.3685                         | 0.3326                            | 1.23 | 1.09 | 1.39 | <b>8.65E-04</b> | <b>5.94E-03</b>     | 0.9809            |
| rs62489135    | 11430738  | C/A                    | 0.1020                         | 0.1042                            | 1.01 | 0.83 | 1.23 | 0.9564          | 0.9813              | 0.1192            |
| rs62489136    | 11431026  | C/G                    | 0.1020                         | 0.1042                            | 1.01 | 0.83 | 1.23 | 0.9564          | 0.9813              | 0.1192            |
| rs2248700     | 11431154  | G/A                    | 0.3977                         | 0.3424                            | 1.33 | 1.18 | 1.50 | <b>4.26E-06</b> | <b>1.05E-04</b>     | 0.9468            |
| rs2248699     | 11431173  | A/G                    | 0.5148                         | 0.4633                            | 1.29 | 1.14 | 1.45 | <b>3.61E-05</b> | <b>3.88E-04</b>     | 0.4005            |
| rs2248696     | 11431212  | C/T                    | 0.3977                         | 0.3424                            | 1.33 | 1.18 | 1.50 | <b>4.26E-06</b> | <b>1.05E-04</b>     | 0.9468            |
| rs17153419    | 11431642  | G/A                    | 0.3227                         | 0.2913                            | 1.21 | 1.06 | 1.38 | <b>3.95E-03</b> | <b>0.0136</b>       | 0.9927            |
| rs1478898     | 11432488  | G/A                    | 0.5148                         | 0.4633                            | 1.29 | 1.14 | 1.45 | <b>3.69E-05</b> | <b>3.88E-04</b>     | 0.4018            |
| rs1478897     | 11432641  | T/A                    | 0.4057                         | 0.3540                            | 1.30 | 1.16 | 1.47 | <b>1.40E-05</b> | <b>1.84E-04</b>     | 0.8964            |
| chr8:11433128 | 11433128  | G/A                    | 0.0065                         | 0.0114                            | 0.55 | 0.29 | 1.06 | 0.0680          | 0.1279              | NA                |
| chr8:11433666 | 11433666  | A/G                    | 0.0065                         | 0.0114                            | 0.55 | 0.29 | 1.06 | 0.0680          | 0.1279              | NA                |
| rs7014565     | 11434227  | T/C                    | 0.1036                         | 0.1095                            | 0.93 | 0.77 | 1.13 | 0.4800          | 0.6117              | 0.0869            |
| rs2409784     | 11434265  | C/A                    | 0.4867                         | 0.4482                            | 1.22 | 1.08 | 1.37 | <b>1.31E-03</b> | <b>7.15E-03</b>     | 0.6660            |
| rs2169889     | 11434323  | C/T                    | 0.0079                         | 0.0112                            | 0.66 | 0.36 | 1.23 | 0.1904          | 0.2893              | NA                |
| rs7004267     | 11434383  | A/T                    | 0.1012                         | 0.1027                            | 1.02 | 0.84 | 1.24 | 0.8509          | 0.9109              | 0.1373            |
| rs6981617     | 11434992  | T/C                    | 0.1012                         | 0.1027                            | 1.02 | 0.83 | 1.24 | 0.8588          | 0.9109              | 0.1381            |
| rs9657551     | 11435592  | G/A                    | 0.3724                         | 0.3336                            | 1.24 | 1.10 | 1.40 | <b>5.97E-04</b> | <b>4.72E-03</b>     | 0.9671            |
| rs35451117    | 11435744  | A/C                    | 0.1008                         | 0.1025                            | 1.02 | 0.83 | 1.24 | 0.8590          | 0.9109              | 0.1374            |
| rs4366049     | 11435913  | G/A                    | 0.3806                         | 0.3433                            | 1.24 | 1.09 | 1.40 | <b>8.14E-04</b> | <b>5.94E-03</b>     | 0.9428            |
| chr8:11436013 | 11436013  | C/G                    | 0.0065                         | 0.0094                            | 0.64 | 0.33 | 1.25 | 0.1855          | 0.2854              | NA                |
| chr8:11436018 | 11436018  | C/T                    | 0.0065                         | 0.0094                            | 0.64 | 0.33 | 1.25 | 0.1855          | 0.2854              | NA                |
| chr8:11437211 | 11437211  | C/T                    | 0.0065                         | 0.0094                            | 0.64 | 0.33 | 1.25 | 0.1847          | 0.2854              | NA                |

|               |          |     |        |        |      |      |       |                 |                 |        |
|---------------|----------|-----|--------|--------|------|------|-------|-----------------|-----------------|--------|
| chr8:11437298 | 11437298 | T/C | 0.0148 | 0.0068 | 2.12 | 1.17 | 3.82  | <b>0.0101</b>   | <b>0.0297</b>   | 0.6504 |
| chr8:11438059 | 11438059 | A/G | 0.0061 | 0.0094 | 0.61 | 0.31 | 1.21  | 0.1447          | 0.2357          | NA     |
| rs2244931     | 11441178 | G/C | 0.4680 | 0.4664 | 1.03 | 0.92 | 1.16  | 0.6305          | 0.7547          | 0.2052 |
| rs7820492     | 11441923 | A/G | 0.4645 | 0.4906 | 0.84 | 0.75 | 0.95  | <b>3.67E-03</b> | <b>0.0135</b>   | 0.9755 |
| rs6994605     | 11442846 | G/A | 0.0066 | 0.0087 | 0.69 | 0.35 | 1.36  | 0.2732          | 0.3854          | NA     |
| rs55758736    | 11442985 | A/G | 0.0217 | 0.0092 | 2.27 | 1.37 | 3.75  | <b>1.30E-03</b> | <b>7.15E-03</b> | 0.4600 |
| rs6999912     | 11443766 | A/G | 0.3909 | 0.4151 | 0.86 | 0.77 | 0.97  | <b>0.0139</b>   | <b>0.0380</b>   | 0.5293 |
| chr8:11443817 | 11443817 | A/G | 0.0217 | 0.0092 | 2.27 | 1.37 | 3.76  | <b>1.30E-03</b> | <b>7.15E-03</b> | 0.4614 |
| rs4841553     | 11444224 | C/T | 0.4896 | 0.4587 | 1.19 | 1.06 | 1.34  | <b>3.47E-03</b> | <b>0.0133</b>   | 0.9488 |
| chr8:11444448 | 11444448 | C/A | 0.0062 | 0.0087 | 0.64 | 0.32 | 1.28  | 0.1936          | 0.2894          | NA     |
| chr8:11444706 | 11444706 | T/C | 0.0217 | 0.0092 | 2.27 | 1.37 | 3.76  | <b>1.28E-03</b> | <b>7.15E-03</b> | 0.4645 |
| chr8:11446229 | 11446229 | T/C | 0.0237 | 0.0109 | 2.13 | 1.32 | 3.44  | <b>1.75E-03</b> | <b>8.39E-03</b> | 0.7329 |
| chr8:11446791 | 11446791 | T/G | 0.0220 | 0.0090 | 2.29 | 1.38 | 3.81  | <b>1.16E-03</b> | <b>7.15E-03</b> | 0.5059 |
| rs2255227     | 11447947 | C/T | 0.0220 | 0.0090 | 2.29 | 1.38 | 3.80  | <b>1.19E-03</b> | <b>7.15E-03</b> | 0.5091 |
| rs4841556     | 11448952 | T/A | 0.2978 | 0.3383 | 0.80 | 0.71 | 0.91  | <b>4.69E-04</b> | <b>4.01E-03</b> | 0.8678 |
| chr8:11449209 | 11449209 | C/T | 0.0062 | 0.0087 | 0.64 | 0.32 | 1.28  | 0.1960          | 0.2894          | NA     |
| rs17744726    | 11449232 | A/G | 0.2978 | 0.3381 | 0.80 | 0.71 | 0.91  | <b>4.82E-04</b> | <b>4.01E-03</b> | 0.8652 |
| chr8:11451210 | 11451210 | A/C | 0.0053 | 0.0083 | 0.56 | 0.27 | 1.18  | 0.1167          | 0.1962          | NA     |
| rs7007439     | 11453203 | T/A | 0.4101 | 0.3870 | 1.15 | 1.02 | 1.30  | <b>0.0232</b>   | 0.0533          | 0.6664 |
| rs6983727     | 11453221 | T/C | 0.4551 | 0.4879 | 0.85 | 0.76 | 0.96  | <b>7.01E-03</b> | <b>0.0213</b>   | 0.5927 |
| rs7011778     | 11453580 | T/C | 0.4101 | 0.3870 | 1.15 | 1.02 | 1.30  | <b>0.0203</b>   | <b>0.0485</b>   | 0.6753 |
| chr8:11455041 | 11455041 | C/A | 0.1127 | 0.1081 | 1.05 | 0.87 | 1.26  | 0.6181          | 0.7476          | 0.0430 |
| chr8:11455750 | 11455750 | T/C | 0.0049 | 0.0083 | 0.51 | 0.24 | 1.09  | 0.0727          | 0.1335          | NA     |
| rs62490888    | 11456175 | A/G | 0.1126 | 0.1081 | 1.05 | 0.87 | 1.26  | 0.6198          | 0.7476          | 0.0456 |
| rs4841561     | 11456182 | T/C | 0.3811 | 0.3661 | 1.11 | 0.98 | 1.25  | 0.0910          | 0.1563          | 0.8478 |
| rs11250148    | 11457261 | C/T | 0.3853 | 0.3593 | 1.17 | 1.03 | 1.32  | <b>0.0125</b>   | <b>0.0350</b>   | 0.6305 |
| rs10109802    | 11457270 | G/T | 0.3696 | 0.3467 | 1.14 | 1.01 | 1.29  | <b>0.0339</b>   | 0.0724          | 0.5620 |
| rs35401006    | 11457513 | G/C | 0.3841 | 0.3591 | 1.16 | 1.03 | 1.31  | <b>0.0145</b>   | <b>0.0389</b>   | 0.5754 |
| rs13262953    | 11457630 | A/G | 0.3639 | 0.3409 | 1.16 | 1.02 | 1.31  | <b>0.0234</b>   | 0.0533          | 0.6500 |
| rs7834638     | 11457704 | C/T | 0.3840 | 0.3597 | 1.16 | 1.03 | 1.31  | <b>0.0155</b>   | <b>0.0400</b>   | 0.5772 |
| rs11776201    | 11458307 | G/A | 0.0152 | 0.0154 | 1.08 | 0.67 | 1.75  | 0.7456          | 0.8537          | 0.8009 |
| rs2279169     | 11458425 | A/G | 0.3821 | 0.3577 | 1.16 | 1.03 | 1.31  | <b>0.0177</b>   | <b>0.0437</b>   | 0.5424 |
| rs62490890    | 11458663 | T/C | 0.1156 | 0.1091 | 1.06 | 0.88 | 1.28  | 0.5381          | 0.6801          | 0.0607 |
| rs10097005    | 11458767 | A/C | 0.3817 | 0.3572 | 1.16 | 1.03 | 1.31  | <b>0.0166</b>   | <b>0.0416</b>   | 0.5656 |
| rs10097015    | 11458793 | T/C | 0.3817 | 0.3572 | 1.16 | 1.03 | 1.31  | <b>0.0166</b>   | <b>0.0416</b>   | 0.5656 |
| rs1042689     | 11459202 | T/C | 0.3807 | 0.3571 | 1.15 | 1.02 | 1.30  | <b>0.0199</b>   | <b>0.0483</b>   | 0.5281 |
| rs2250986     | 11459698 | C/G | 0.3827 | 0.3568 | 1.17 | 1.03 | 1.32  | <b>0.0126</b>   | <b>0.0350</b>   | 0.4920 |
| rs62490891    | 11459834 | T/A | 0.1162 | 0.1115 | 1.04 | 0.87 | 1.25  | 0.6771          | 0.7984          | 0.0267 |
| rs7840748     | 11459853 | A/G | 0.0057 | 0.0010 | 5.95 | 1.47 | 24.06 | <b>5.72E-03</b> | <b>0.0185</b>   | NA     |
| rs12549144    | 11460270 | G/C | 0.4969 | 0.4719 | 1.14 | 1.02 | 1.28  | <b>0.0262</b>   | 0.0583          | 0.7217 |
| rs12549150    | 11460345 | T/C | 0.4956 | 0.4716 | 1.14 | 1.01 | 1.28  | <b>0.0304</b>   | 0.0657          | 0.6614 |
| rs12541800    | 11460481 | G/A | 0.4944 | 0.4718 | 1.13 | 1.01 | 1.27  | <b>0.0373</b>   | 0.0747          | 0.6910 |
| chr8:11460552 | 11460552 | T/A | 0.1182 | 0.1121 | 1.05 | 0.87 | 1.26  | 0.6023          | 0.7378          | 0.0308 |
| rs10094362    | 11460790 | G/T | 0.1174 | 0.1107 | 1.06 | 0.88 | 1.27  | 0.5535          | 0.6886          | 0.0283 |
| rs34379689    | 11460843 | G/A | 0.3725 | 0.3519 | 1.14 | 1.01 | 1.29  | <b>0.0374</b>   | 0.0747          | 0.5974 |
| rs755320      | 11460848 | G/A | 0.1358 | 0.1221 | 1.11 | 0.93 | 1.32  | 0.2460          | 0.3512          | 0.0354 |
| rs62490892    | 11460924 | T/C | 0.1176 | 0.1139 | 1.02 | 0.84 | 1.22  | 0.8746          | 0.9180          | 0.0217 |
| rs62490893    | 11460927 | A/G | 0.1033 | 0.1023 | 1.00 | 0.82 | 1.22  | 0.9868          | 0.9868          | 0.0182 |
| rs35067819    | 11460946 | A/G | 0.3582 | 0.3389 | 1.12 | 0.99 | 1.27  | 0.0691          | 0.1285          | 0.7052 |
| rs11786268    | 11461601 | T/C | 0.1182 | 0.1125 | 1.04 | 0.87 | 1.25  | 0.6666          | 0.7919          | 0.0355 |
| rs4841563     | 11462490 | T/G | 0.3718 | 0.3504 | 1.14 | 1.01 | 1.29  | <b>0.0371</b>   | 0.0747          | 0.6314 |
| rs13280813    | 11462514 | T/G | 0.4562 | 0.4897 | 0.85 | 0.76 | 0.96  | <b>8.36E-03</b> | <b>0.0249</b>   | 0.6330 |
| rs4841564     | 11463218 | G/T | 0.4684 | 0.5048 | 0.84 | 0.75 | 0.94  | <b>3.53E-03</b> | <b>0.0133</b>   | 0.6926 |
| rs10093314    | 11463522 | C/T | 0.0176 | 0.0153 | 1.21 | 0.76 | 1.94  | 0.4165          | 0.5404          | 0.5392 |
| rs10093575    | 11463731 | T/C | 0.1177 | 0.1129 | 1.03 | 0.86 | 1.24  | 0.7444          | 0.8537          | 0.0353 |
| rs35370321    | 11463809 | G/T | 0.3789 | 0.3543 | 1.15 | 1.02 | 1.30  | <b>0.0236</b>   | 0.0533          | 0.6570 |
| rs1382562     | 11464027 | A/G | 0.0176 | 0.0146 | 1.30 | 0.81 | 2.08  | 0.2877          | 0.3950          | 0.3367 |
| rs1382563     | 11464199 | C/G | 0.4671 | 0.5027 | 0.85 | 0.76 | 0.96  | <b>6.30E-03</b> | <b>0.0199</b>   | 0.7650 |
| rs9650661     | 11464542 | T/G | 0.4684 | 0.5069 | 0.84 | 0.75 | 0.94  | <b>2.96E-03</b> | <b>0.0117</b>   | 0.7095 |
| rs12547947    | 11464750 | G/T | 0.3573 | 0.3324 | 1.16 | 1.02 | 1.32  | <b>0.0208</b>   | <b>0.0491</b>   | 0.9015 |
| rs10107563    | 11464901 | A/G | 0.0167 | 0.0142 | 1.28 | 0.79 | 2.07  | 0.3172          | 0.4252          | 0.4553 |
| rs7831039     | 11465046 | T/A | 0.4627 | 0.5030 | 0.83 | 0.74 | 0.94  | <b>2.19E-03</b> | <b>9.12E-03</b> | 0.8291 |
| rs11991139    | 11465804 | T/C | 0.4691 | 0.5090 | 0.83 | 0.74 | 0.94  | <b>2.16E-03</b> | <b>9.12E-03</b> | 0.7614 |
| rs899366      | 11467894 | A/G | 0.3420 | 0.3087 | 1.21 | 1.07 | 1.37  | <b>2.14E-03</b> | <b>9.12E-03</b> | 0.8288 |
| rs61199332    | 11468050 | T/C | 0.0156 | 0.0118 | 1.38 | 0.83 | 2.29  | 0.2100          | 0.3072          | 0.6903 |
| rs12679960    | 11468399 | T/C | 0.3511 | 0.3223 | 1.20 | 1.05 | 1.36  | <b>5.67E-03</b> | <b>0.0185</b>   | 0.6945 |
| rs11776081    | 11468631 | A/G | 0.1138 | 0.1129 | 1.00 | 0.83 | 1.20  | 0.9667          | 0.9817          | 0.0480 |
| rs4841566     | 11469847 | C/G | 0.3421 | 0.3084 | 1.21 | 1.07 | 1.38  | <b>2.18E-03</b> | <b>9.12E-03</b> | 0.8591 |
| rs35353728    | 11469862 | T/C | 0.3274 | 0.3010 | 1.18 | 1.04 | 1.34  | <b>0.0110</b>   | <b>0.0316</b>   | 0.9001 |
| chr8:11470221 | 11470221 | G/C | 0.1452 | 0.1311 | 1.12 | 0.94 | 1.33  | 0.2152          | 0.3120          | 0.0350 |
| rs2127128     | 11472338 | C/T | 0.3313 | 0.3045 | 1.19 | 1.05 | 1.36  | <b>6.92E-03</b> | <b>0.0213</b>   | 0.8362 |
| rs968179      | 11475473 | T/G | 0.3301 | 0.3021 | 1.19 | 1.05 | 1.35  | <b>5.67E-03</b> | <b>0.0185</b>   | 0.8900 |
| rs3802235     | 11475653 | A/G | 0.0103 | 0.0056 | 2.12 | 1.04 | 4.31  | <b>0.0358</b>   | <b>0.0743</b>   | 0.6982 |

Single marker association tests of genotyped (underlined) and imputed SNPs. \*Positions on chr8 obtained from the National Center for Biotechnology Information (NCBI) Build 36. \*\*Odds ratios (ORs) and 95% confidence intervals (defined by L95 -lower limit- and U95 -upper limit-) were calculated for the allele 1 of each SNP by a meta-analysis with the country of origin as the stratification variable. The value  $P_{CMH}$  indicates the significance of the allelic association determined by the Cochran-Mantel-Haenszel test, while  $P_{CMH-corrected}$  displays the association after adjustment for false discovery rate, and  $P_{Breslow-Day}$  is the  $P$  value determined using the Breslow-Day test for homogeneity of the ORs. The analyses were performed using PLINK software, version 1.07.

**Table S2** *Conditional association analysis*

| SNP           | Position | MAF    | N    | OR    | Step 1 -<br>Meta-<br>analysis | Step 2 - MA<br>conditioning<br>on rs998683 | Step 3 - MA<br>conditioning<br>on rs998683 +<br>chr8:11446791 | Step 4 - MA<br>conditioning<br>on rs998683 +<br>chr8:11446791<br>+<br>chr8:11437298 | Step 5 - MA<br>conditioning<br>on rs998683 +<br>chr8:11446791<br>+<br>chr8:11437298<br>+<br>rs4841553 | r2<br>rs13277113 | r2<br>Ala71Thr |
|---------------|----------|--------|------|-------|-------------------------------|--------------------------------------------|---------------------------------------------------------------|-------------------------------------------------------------------------------------|-------------------------------------------------------------------------------------------------------|------------------|----------------|
| rs2409780     | 11374997 | 0.2767 | 2523 | 1.61  | 7.92E-06                      |                                            |                                                               |                                                                                     |                                                                                                       | 99.9%            | 0.4%           |
| rs2618444     | 11375780 | 0.2767 | 2523 | 1.61  | 7.92E-06                      |                                            |                                                               |                                                                                     |                                                                                                       | 99.9%            | 0.4%           |
| rs7812879     | 11377591 | 0.1229 | 2527 | 0.94  |                               |                                            |                                                               |                                                                                     |                                                                                                       | 5.3%             | 0.2%           |
| rs2736335     | 11378897 | 0.1169 | 2520 | 0.90  |                               |                                            |                                                               |                                                                                     |                                                                                                       | 5.0%             | 0.3%           |
| rs2736336     | 11379280 | 0.2768 | 2527 | 1.62  | 5.69E-06                      |                                            |                                                               |                                                                                     |                                                                                                       | 99.9%            | 0.4%           |
| rs2736337     | 11379290 | 0.2768 | 2527 | 1.62  | 5.69E-06                      |                                            |                                                               |                                                                                     |                                                                                                       | 99.9%            | 0.4%           |
| rs2736338     | 11379293 | 0.2735 | 2506 | 1.62  | 4.86E-06                      |                                            |                                                               |                                                                                     |                                                                                                       | 100.0%           | 0.3%           |
| rs2254546     | 11381089 | 0.1192 | 2559 | 0.97  |                               |                                            |                                                               |                                                                                     |                                                                                                       | 5.0%             | 0.2%           |
| rs2736340     | 11381382 | 0.2714 | 2646 | 1.62  | 3.50E-06                      |                                            |                                                               |                                                                                     |                                                                                                       | 99.8%            | 0.4%           |
| rs1478900     | 11385069 | 0.1198 | 2558 | 0.99  |                               |                                            |                                                               |                                                                                     |                                                                                                       | 5.0%             | 0.2%           |
| rs13277113    | 11386595 | 0.2676 | 2612 | 1.63  | 3.65E-06                      |                                            |                                                               |                                                                                     |                                                                                                       | 100.0%           | 0.3%           |
| rs2736343     | 11386659 | 0.1203 | 2552 | 0.96  |                               |                                            |                                                               |                                                                                     |                                                                                                       | 5.1%             | 0.1%           |
| rs2251056     | 11386985 | 0.1203 | 2552 | 0.96  |                               |                                            |                                                               |                                                                                     |                                                                                                       | 5.1%             | 0.1%           |
| rs9694294     | 11388130 | 0.1198 | 2516 | 0.97  |                               |                                            |                                                               |                                                                                     |                                                                                                       | 5.2%             | 0.1%           |
| rs2250788     | 11389465 | 0.1204 | 2553 | 0.96  |                               |                                            |                                                               |                                                                                     |                                                                                                       | 5.1%             | 0.1%           |
| rs998683      | 11390409 | 0.2609 | 2507 | 1.66  | 1.61E-06                      |                                            |                                                               |                                                                                     |                                                                                                       | 99.7%            | 0.3%           |
| rs998682      | 11390461 | 0.1177 | 2544 | 1.01  |                               |                                            |                                                               |                                                                                     |                                                                                                       | 5.0%             | 0.1%           |
| rs1478895     | 11390744 | 0.1189 | 2557 | 1.05  |                               |                                            |                                                               |                                                                                     |                                                                                                       | 5.0%             | 0.2%           |
| rs1478890     | 11393011 | 0.4684 | 2646 | 1.47  | 6.06E-05                      |                                            |                                                               |                                                                                     |                                                                                                       | 36.5%            | 1.4%           |
| rs2618479     | 11393230 | 0.1145 | 2481 | 1.01  |                               |                                            |                                                               |                                                                                     |                                                                                                       | 4.2%             | 0.2%           |
| rs2618478     | 11393411 | 0.0970 | 2496 | 1.04  |                               |                                            |                                                               |                                                                                     |                                                                                                       | 3.8%             | 0.2%           |
| rs10100215    | 11399681 | 0.2900 | 2645 | 1.31  | 0.0141                        |                                            |                                                               |                                                                                     |                                                                                                       | 43.6%            | 0.5%           |
| rs2618461     | 11403101 | 0.0074 | 2580 | 2.65  | 0.0390                        | 0.0243                                     |                                                               |                                                                                     |                                                                                                       | 0.5%             | 31.9%          |
| rs11997711    | 11403312 | 0.0035 | 2591 | 2.23  |                               |                                            |                                                               |                                                                                     |                                                                                                       | 0.2%             | 13.0%          |
| rs2736353     | 11404447 | 0.1273 | 2521 | 0.92  |                               |                                            |                                                               |                                                                                     |                                                                                                       | 2.1%             | 0.2%           |
| rs2252729     | 11405628 | 0.1327 | 2592 | 0.83  |                               |                                            |                                                               |                                                                                     |                                                                                                       | 2.1%             | 0.1%           |
| rs2736354     | 11406140 | 0.1347 | 2617 | 0.81  |                               |                                            |                                                               |                                                                                     |                                                                                                       | 2.1%             | 0.1%           |
| rs2618458     | 11406477 | 0.1335 | 2596 | 0.80  |                               |                                            |                                                               |                                                                                     |                                                                                                       | 2.1%             | 0.1%           |
| rs2618457     | 11406586 | 0.1335 | 2596 | 0.80  |                               |                                            |                                                               |                                                                                     |                                                                                                       | 2.1%             | 0.1%           |
| rs4841545     | 11406645 | 0.3664 | 2646 | 0.68  | 0.0036                        |                                            | 0.0349                                                        | 0.0199                                                                              |                                                                                                       | 15.2%            | 1.9%           |
| rs2736355     | 11407186 | 0.1377 | 2476 | 0.84  |                               |                                            |                                                               |                                                                                     |                                                                                                       | 2.6%             | 0.1%           |
| rs6993775     | 11407398 | 0.1451 | 2646 | 0.84  |                               |                                            |                                                               |                                                                                     |                                                                                                       | 2.6%             | 0.4%           |
| rs2618456     | 11408142 | 0.1290 | 2570 | 0.79  |                               |                                            |                                                               |                                                                                     |                                                                                                       | 2.1%             | 0.1%           |
| rs2618455     | 11408287 | 0.1311 | 2608 | 0.75  |                               |                                            |                                                               |                                                                                     |                                                                                                       | 2.3%             | 0.2%           |
| rs12674768    | 11408956 | 0.2511 | 2581 | 1.40  | 0.0026                        |                                            |                                                               |                                                                                     |                                                                                                       | 47.3%            | 0.5%           |
| rs11990277    | 11409494 | 0.2560 | 2646 | 1.41  | 0.0017                        |                                            |                                                               |                                                                                     |                                                                                                       | 43.6%            | 0.5%           |
| rs2736359     | 11409508 | 0.1242 | 2573 | 0.85  |                               |                                            |                                                               |                                                                                     |                                                                                                       | 2.0%             | 0.1%           |
| rs11250142    | 11409942 | 0.1237 | 2542 | 0.88  |                               |                                            |                                                               |                                                                                     |                                                                                                       | 2.0%             | 0.1%           |
| rs12677903    | 11410046 | 0.2563 | 2608 | 1.42  | 0.0016                        |                                            |                                                               |                                                                                     |                                                                                                       | 45.4%            | 0.6%           |
| rs17153385    | 11410673 | 0.1009 | 2558 | 0.93  |                               |                                            |                                                               |                                                                                     |                                                                                                       | 2.1%             | 0.3%           |
| rs4841546     | 11411516 | 0.2552 | 2578 | 1.41  | 0.0020                        |                                            |                                                               |                                                                                     |                                                                                                       | 46.4%            | 0.5%           |
| chr8:11411637 | 11411637 | 0.1234 | 2532 | 0.86  |                               |                                            |                                                               |                                                                                     |                                                                                                       | 2.0%             | 0.1%           |
| rs55903839    | 11411696 | 0.0183 | 2617 | 1.35  |                               |                                            |                                                               |                                                                                     |                                                                                                       | 4.9%             | 0.0%           |
| rs2618450     | 11414199 | 0.2428 | 2646 | 1.14  |                               | 0.0362                                     | 0.0253                                                        |                                                                                     |                                                                                                       | 1.9%             | 0.3%           |
| rs2729940     | 11419776 | 0.4167 | 2646 | 1.34  | 0.0037                        |                                            |                                                               |                                                                                     |                                                                                                       | 31.8%            | 0.1%           |
| rs2252797     | 11420068 | 0.4085 | 2646 | 0.63  | 4.39E-04                      | 0.0368                                     |                                                               | 0.0409                                                                              |                                                                                                       | 15.7%            | 1.1%           |
| chr8:11421060 | 11421060 | 0.0083 | 2635 | -0.09 | 0.0282                        | 0.0487                                     |                                                               |                                                                                     |                                                                                                       | 0.2%             | 0.1%           |
| chr8:11421946 | 11421946 | 0.0087 | 2637 | 0.12  |                               |                                            |                                                               |                                                                                     |                                                                                                       | 0.2%             | 0.1%           |
| rs2618443     | 11421965 | 0.4476 | 2645 | 1.39  | 7.88E-04                      |                                            |                                                               |                                                                                     |                                                                                                       | 31.4%            | 2.1%           |
| chr8:11422004 | 11422004 | 0.0087 | 2637 | 0.12  |                               |                                            |                                                               |                                                                                     |                                                                                                       | 0.2%             | 0.1%           |
| chr8:11422232 | 11422232 | 0.0087 | 2637 | 0.12  |                               |                                            |                                                               |                                                                                     |                                                                                                       | 0.2%             | 0.1%           |
| rs11250144    | 11423685 | 0.3014 | 2465 | 1.40  | 0.0018                        |                                            |                                                               |                                                                                     |                                                                                                       | 57.8%            | 0.4%           |
| rs2249275     | 11425691 | 0.0082 | 2511 | 2.23  |                               | 0.0308                                     |                                                               |                                                                                     |                                                                                                       | 0.2%             | 48.6%          |
| rs2264866     | 11426062 | 0.3394 | 2646 | 0.80  |                               |                                            |                                                               |                                                                                     |                                                                                                       | 14.7%            | 0.7%           |
| chr8:11426473 | 11426473 | 0.0089 | 2637 | 0.21  |                               |                                            |                                                               |                                                                                     |                                                                                                       | 0.2%             | 0.1%           |
| chr8:11426486 | 11426486 | 0.0089 | 2637 | 0.21  |                               |                                            |                                                               |                                                                                     |                                                                                                       | 0.2%             | 0.1%           |
| rs4841550     | 11426633 | 0.4467 | 2646 | 0.78  | 0.0406                        |                                            |                                                               |                                                                                     |                                                                                                       | 22.0%            | 0.3%           |
| rs58373594    | 11428036 | 0.1019 | 2484 | 1.04  |                               |                                            |                                                               |                                                                                     |                                                                                                       | 2.0%             | 0.2%           |
| rs2249040     | 11428188 | 0.3657 | 2617 | 1.54  | 7.75E-06                      |                                            |                                                               |                                                                                     |                                                                                                       | 47.1%            | 3.8%           |
| rs57240873    | 11428190 | 0.1017 | 2483 | 1.04  |                               |                                            |                                                               |                                                                                     |                                                                                                       | 2.0%             | 0.2%           |
| rs2248932     | 11429059 | 0.3678 | 2640 | 1.51  | 2.06E-05                      |                                            |                                                               |                                                                                     |                                                                                                       | 43.0%            | 3.4%           |
| chr8:11429919 | 11429919 | 0.0093 | 2643 | 0.10  |                               |                                            |                                                               |                                                                                     |                                                                                                       | 0.3%             | 0.1%           |
| chr8:11429946 | 11429946 | 0.0093 | 2643 | 0.10  |                               |                                            |                                                               |                                                                                     |                                                                                                       | 0.3%             | 0.1%           |
| rs9329246     | 11430289 | 0.3483 | 2646 | 1.40  | 8.32E-04                      |                                            |                                                               |                                                                                     |                                                                                                       | 52.2%            | 0.3%           |
| rs62489135    | 11430738 | 0.1032 | 2485 | 1.01  |                               |                                            |                                                               |                                                                                     |                                                                                                       | 1.9%             | 0.2%           |
| rs62489136    | 11431026 | 0.1032 | 2485 | 1.01  |                               |                                            |                                                               |                                                                                     |                                                                                                       | 1.9%             | 0.2%           |
| rs2248700     | 11431154 | 0.3666 | 2638 | 1.55  | 5.39E-06                      |                                            |                                                               |                                                                                     |                                                                                                       | 47.2%            | 3.7%           |
| rs2248699     | 11431173 | 0.4858 | 2473 | 1.47  | 5.36E-05                      |                                            |                                                               |                                                                                     |                                                                                                       | 34.5%            | 2.4%           |
| rs2248696     | 11431212 | 0.3666 | 2638 | 1.55  | 5.39E-06                      |                                            |                                                               |                                                                                     |                                                                                                       | 47.2%            | 3.7%           |
| rs17153419    | 11431642 | 0.3050 | 2487 | 1.38  | 0.0040                        |                                            |                                                               |                                                                                     |                                                                                                       | 55.5%            | 0.4%           |
| rs1478898     | 11432488 | 0.4858 | 2473 | 1.47  | 5.46E-05                      |                                            |                                                               |                                                                                     |                                                                                                       | 34.3%            | 2.4%           |
| rs1478897     | 11432641 | 0.3766 | 2646 | 1.52  | 1.63E-05                      |                                            |                                                               |                                                                                     |                                                                                                       | 44.2%            | 3.5%           |
| chr8:11433128 | 11433128 | 0.0093 | 2643 | 0.10  |                               |                                            |                                                               |                                                                                     |                                                                                                       | 0.3%             | 0.1%           |
| chr8:11433666 | 11433666 | 0.0093 | 2643 | 0.10  |                               |                                            |                                                               |                                                                                     |                                                                                                       | 0.3%             | 0.1%           |
| rs7014565     | 11434227 | 0.1069 | 2586 | 0.88  |                               |                                            |                                                               |                                                                                     |                                                                                                       | 1.9%             | 0.3%           |
| rs2409784     | 11434265 | 0.4649 | 2533 | 1.37  | 0.0015                        |                                            |                                                               |                                                                                     |                                                                                                       | 37.9%            | 0.1%           |
| rs2169889     | 11434323 | 0.0098 | 2615 | 0.34  |                               |                                            |                                                               |                                                                                     |                                                                                                       | 0.3%             | 0.4%           |
| rs7004267     | 11434383 | 0.1020 | 2475 | 1.03  |                               |                                            |                                                               |                                                                                     |                                                                                                       | 1.8%             | 0.2%           |
| rs6981617     | 11434992 | 0.1021 | 2474 | 1.03  |                               |                                            |                                                               |                                                                                     |                                                                                                       | 1.8%             | 0.2%           |
| rs9657551     | 11435592 | 0.3504 | 2583 | 1.41  | 6.10E-04                      |                                            |                                                               |                                                                                     |                                                                                                       | 53.0%            | 0.0%           |
| rs35451117    | 11435744 | 0.1017 | 2472 | 1.03  |                               |                                            |                                                               |                                                                                     |                                                                                                       | 1.8%             | 0.2%           |

|               |          |        |      |             |          |                 |               |               |       |        |
|---------------|----------|--------|------|-------------|----------|-----------------|---------------|---------------|-------|--------|
| rs4366049     | 11435913 | 0.3593 | 2534 | 1.41        | 8.59E-04 |                 |               |               | 50.6% | 0.1%   |
| chr8:11436013 | 11436013 | 0.0082 | 2637 | 0.28        |          |                 |               |               | 0.3%  | 0.1%   |
| chr8:11436018 | 11436018 | 0.0082 | 2637 | 0.28        |          |                 |               |               | 0.3%  | 0.1%   |
| chr8:11437211 | 11437211 | 0.0082 | 2636 | 0.28        |          |                 |               |               | 0.3%  | 0.1%   |
| chr8:11437298 | 11437298 | 0.0103 | 2472 | 2.84        | 0.0111   | 0.0040          | <b>0.0044</b> |               | 0.2%  | 0.3%   |
| chr8:11438059 | 11438059 | 0.0080 | 2635 | 0.21        |          |                 |               |               | 0.3%  | 0.0%   |
| rs2244931     | 11441178 | 0.4671 | 2644 | 1.05        |          |                 |               |               | 10.4% | 1.4%   |
| rs7820492     | 11441923 | 0.4792 | 2644 | 0.69        | 0.0033   |                 | 0.0183        | 0.0160        | 7.1%  | 1.3%   |
| rs6994605     | 11442846 | 0.0078 | 2574 | 0.37        |          |                 |               |               | 0.3%  | 0.0%   |
| rs55758736    | 11442985 | 0.0146 | 2605 | 2.99        | 0.0012   | 4.00E-04        |               |               | 0.3%  | 100.0% |
| rs6999912     | 11443766 | 0.4045 | 2645 | 0.73        | 0.0125   |                 |               | 0.0347        | 11.6% | 1.5%   |
| chr8:11443817 | 11443817 | 0.0146 | 2602 | 2.98        | 0.0012   | 3.98E-04        |               |               | 0.4%  | 100.0% |
| rs4841553     | 11444224 | 0.4722 | 2646 | 1.34        | 0.0031   |                 | 0.0229        | <b>0.0156</b> | 8.2%  | 1.1%   |
| chr8:11444448 | 11444448 | 0.0076 | 2572 | 0.26        |          |                 |               |               | 0.2%  | 0.0%   |
| chr8:11444706 | 11444706 | 0.0146 | 2597 | 3.01        | 0.0011   | 3.96E-04        |               |               | 0.4%  | 100.0% |
| chr8:11446229 | 11446229 | 0.0165 | 2517 | 2.84        | 0.0016   | 4.75E-04        |               |               | 0.4%  | 90.8%  |
| chr8:11446791 | 11446791 | 0.0146 | 2565 | 3.05        | 0.0010   | <b>3.57E-04</b> |               |               | 0.3%  | 100.0% |
| rs2255227     | 11447947 | 0.0146 | 2563 | 3.05        | 0.0011   | 3.67E-04        |               |               | 0.3%  | 100.0% |
| rs4841556     | 11448952 | 0.3206 | 2645 | 0.62        | 5.52E-04 | 0.0418          |               |               | 13.6% | 1.1%   |
| chr8:11449209 | 11449209 | 0.0076 | 2569 | 0.26        |          |                 |               |               | 0.2%  | 0.0%   |
| rs17744726    | 11449232 | 0.3205 | 2644 | 0.62        | 5.67E-04 | 0.0425          |               |               | 13.6% | 1.0%   |
| chr8:11451210 | 11451210 | 0.0070 | 2565 | 0.09        |          |                 |               |               | 0.2%  | 0.0%   |
| rs7007439     | 11453203 | 0.3972 | 2494 | 1.26        | 0.0231   |                 |               |               | 23.8% | 0.8%   |
| rs6983727     | 11453221 | 0.4735 | 2581 | 0.71        | 0.0069   |                 |               |               | 25.4% | 0.2%   |
| rs7011778     | 11453580 | 0.3972 | 2558 | 1.27        | 0.0202   |                 |               |               | 23.2% | 0.8%   |
| chr8:11455041 | 11455041 | 0.1101 | 2575 | 1.09        |          |                 |               |               | 1.2%  | 0.0%   |
| chr8:11455750 | 11455750 | 0.0068 | 2564 | -0.03       |          |                 |               |               | 0.2%  | 0.0%   |
| rs62490888    | 11456175 | 0.1100 | 2581 | 1.09        |          |                 |               |               | 1.2%  | 0.0%   |
| rs4841561     | 11456182 | 0.3726 | 2646 | 1.19        |          |                 |               |               | 21.5% | 0.6%   |
| rs11250148    | 11457261 | 0.3706 | 2628 | 1.29        | 0.0129   |                 |               |               | 20.0% | 0.1%   |
| rs10109802    | 11457270 | 0.3567 | 2575 | 1.27        | 0.0318   |                 |               |               | 17.1% | 0.0%   |
| rs35401006    | 11457513 | 0.3700 | 2639 | 1.29        | 0.0149   |                 |               |               | 20.0% | 0.1%   |
| rs13262953    | 11457630 | 0.3509 | 2532 | 1.28        | 0.0234   |                 |               |               | 22.9% | 0.1%   |
| rs7834638     | 11457704 | 0.3703 | 2645 | 1.28        | 0.0157   |                 |               |               | 19.3% | 0.0%   |
| rs11776201    | 11458307 | 0.0153 | 2580 | 1.15        |          |                 |               |               | 0.8%  | 0.0%   |
| rs2279169     | 11458425 | 0.3683 | 2628 | 1.28        | 0.0181   |                 |               |               | 20.7% | 0.1%   |
| rs62490890    | 11458663 | 0.1119 | 2596 | 1.11        |          |                 |               |               | 1.4%  | 0.0%   |
| rs10097005    | 11458767 | 0.3678 | 2622 | 1.28        | 0.0170   |                 |               |               | 20.9% | 0.1%   |
| rs10097015    | 11458793 | 0.3678 | 2622 | 1.28        | 0.0170   |                 |               |               | 20.9% | 0.1%   |
| rs1042689     | 11459202 | 0.3674 | 2616 | 1.27        | 0.0204   |                 |               |               | 21.2% | 0.1%   |
| rs2250986     | 11459698 | 0.3681 | 2611 | 1.29        | 0.0131   |                 |               |               | 21.5% | 0.0%   |
| rs62490891    | 11459834 | 0.1135 | 2607 | 1.07        |          |                 |               |               | 1.2%  | 0.1%   |
| rs7840748     | 11459853 | 0.0031 | 2598 | <b>5.76</b> | 0.0056   | 0.0027          |               |               | 0.2%  | 15.6%  |
| rs12549144    | 11460270 | 0.4827 | 2607 | 1.25        | 0.0264   |                 |               |               | 26.3% | 0.7%   |
| rs12549150    | 11460345 | 0.4820 | 2617 | 1.25        | 0.0306   |                 |               |               | 26.4% | 0.7%   |
| rs12541800    | 11460481 | 0.4817 | 2645 | 1.23        | 0.0370   |                 |               |               | 25.7% | 0.8%   |
| chr8:11460552 | 11460552 | 0.1148 | 2596 | 1.09        |          |                 |               |               | 1.2%  | 0.1%   |
| rs10094362    | 11460790 | 0.1136 | 2593 | 1.10        |          |                 |               |               | 1.3%  | 0.1%   |
| rs34379689    | 11460843 | 0.3609 | 2548 | 1.24        | 0.0376   |                 |               |               | 23.2% | 0.5%   |
| rs755320      | 11460848 | 0.1281 | 2596 | 1.20        |          |                 |               |               | 0.3%  | 0.3%   |
| rs62490892    | 11460924 | 0.1155 | 2467 | 1.03        |          |                 |               |               | 1.2%  | 0.1%   |
| rs62490893    | 11460927 | 0.1028 | 2496 | 1.00        |          |                 |               |               | 0.9%  | 0.1%   |
| rs35067819    | 11460946 | 0.3473 | 2491 | 1.23        |          |                 |               |               | 19.8% | 0.4%   |
| rs11786268    | 11461601 | 0.1150 | 2539 | 1.08        |          |                 |               |               | 1.3%  | 0.1%   |
| rs4841563     | 11462490 | 0.3597 | 2488 | 1.24        | 0.0380   |                 |               |               | 23.8% | 0.5%   |
| rs13280813    | 11462514 | 0.4749 | 2593 | 0.72        | 0.0082   |                 |               |               | 24.7% | 0.3%   |
| rs4841564     | 11463218 | 0.4888 | 2585 | 0.70        | 0.0036   |                 |               |               | 27.3% | 0.2%   |
| rs10093314    | 11463522 | 0.0163 | 2551 | 1.37        |          |                 |               |               | 0.7%  | 0.0%   |
| rs10093575    | 11463731 | 0.1150 | 2531 | 1.06        |          |                 |               |               | 1.3%  | 0.1%   |
| rs35370321    | 11463809 | 0.3650 | 2519 | 1.27        | 0.0241   |                 |               |               | 22.0% | 0.1%   |
| rs1382562     | 11464027 | 0.0159 | 2549 | 1.50        |          |                 |               |               | 0.8%  | 0.0%   |
| rs1382563     | 11464199 | 0.4872 | 2646 | 0.71        | 0.0064   |                 |               |               | 25.8% | 0.3%   |
| rs9650661     | 11464542 | 0.4900 | 2595 | 0.69        | 0.0031   |                 |               |               | 27.1% | 0.3%   |
| rs12547947    | 11464750 | 0.3434 | 2452 | 1.27        | 0.0214   |                 |               |               | 26.6% | 0.5%   |
| rs10107563    | 11464901 | 0.0153 | 2547 | 1.48        |          |                 |               |               | 0.8%  | 0.0%   |
| rs7831039     | 11465046 | 0.4854 | 2631 | 0.68        | 0.0023   |                 |               |               | 26.0% | 0.3%   |
| rs11991139    | 11465804 | 0.4916 | 2561 | 0.68        | 0.0022   |                 |               |               | 27.4% | 0.3%   |
| rs899366      | 11467894 | 0.3233 | 2645 | 1.38        | 0.0021   |                 |               |               | 26.3% | 0.1%   |
| rs61199332    | 11468050 | 0.0135 | 2566 | 1.67        |          |                 |               |               | 0.6%  | 0.0%   |
| rs12679960    | 11468399 | 0.3350 | 2454 | 1.35        | 0.0055   |                 |               |               | 26.5% | 0.1%   |
| rs11776081    | 11468631 | 0.1133 | 2569 | 0.99        |          |                 |               |               | 0.7%  | 0.1%   |
| rs4841566     | 11469847 | 0.3230 | 2619 | 1.37        | 0.0022   |                 |               |               | 27.3% | 0.1%   |
| rs35353728    | 11469862 | 0.3124 | 2585 | 1.31        | 0.0111   |                 |               |               | 30.3% | 0.4%   |
| chr8:11470221 | 11470221 | 0.1373 | 2462 | 1.21        |          |                 |               |               | 1.7%  | 0.1%   |
| rs2127128     | 11472338 | 0.3161 | 2493 | 1.34        | 0.0075   |                 |               |               | 31.5% | 0.8%   |
| rs968179      | 11475473 | 0.3143 | 2604 | 1.34        | 0.0057   |                 |               |               | 29.5% | 0.7%   |
| rs3802235     | 11475653 | 0.0076 | 2551 | 2.67        | 0.0349   |                 |               |               | 0.3%  | 0.1%   |

Conditional analysis of SNPs done by logistic regression using GenABEL's score test. By specifying the country of origin as the *strata* argument, we performed a structured test of association for all the SNPs. In a step-wise manner, the SNP with higher *P*-value was identified in each step and then used as a covariate for the next association step. This analysis demonstrated that the association of BLK could be summarized by the independent associations of SNPs rs998683 and "chr8:11446791". After conditioning by these 2 SNPs, some variants displayed significant although weaker nominal associations (step 3) and thus we continued until no SNP remained associated. GenABEL package was run using R version 2.9.2.



**Table S3.** Statistical analysis for the enrichment of transcription factor binding sites and epigenetic marks in BLK associated and non associated haplotype blocks within the promoter region of BLK.

| Red – chi-square p-value for over-representation; Green – under-representation; empty cell – not significant.<br>Marginal – significant if tested against whole genome |                 |                     |                 |                     |
|------------------------------------------------------------------------------------------------------------------------------------------------------------------------|-----------------|---------------------|-----------------|---------------------|
|                                                                                                                                                                        | <b>B1 assoc</b> | <b>B2 not assoc</b> | <b>B3 assoc</b> | <b>B4 not assoc</b> |
| NFkB                                                                                                                                                                   | 1.86e-04        |                     | Marginal        |                     |
| PAX5-C20/N19                                                                                                                                                           |                 |                     |                 |                     |
| IRF4                                                                                                                                                                   | 2.97E-02        |                     |                 |                     |
| H3K4me2                                                                                                                                                                | 2.09E-04        |                     | 1.05E-03        |                     |
| H3K4me3                                                                                                                                                                | 4.25E-04        |                     | 1.05E-03        |                     |
| H3K9ac                                                                                                                                                                 | 4.54E-04        | Marginal            | 4.46E-03        | Marginal            |
| H3K27ac                                                                                                                                                                | 3.02E-03        |                     | 2.87E-03        | 2.45E-03            |
| H4K20me1                                                                                                                                                               |                 | Marginal            | 7.66E-03        | 9.34E-03            |

NFkB binding sites were identified using Chip-Seq in the ENCODE Project with the antibody described in their information site: [http://genome.ucsc.edu/cgi-bin/hgEncodeVocab?ra=encode%2Fcv.ra&target="NFKB"](http://genome.ucsc.edu/cgi-bin/hgEncodeVocab?ra=encode%2Fcv.ra&target=)

**Table S4. Characterization of 1.2kb haplotype window between SNPs rs2248932 and rs9329246 in B3;**  
Coordinates (hg18): chr8:11429059-11430289

| 1.2kb region SNPs | DNase site | TFBS            | Chromatin state segmentation | RepeatMasker regions | CNV    |
|-------------------|------------|-----------------|------------------------------|----------------------|--------|
| rs2248932         | Yes        | NFKB POU2F2 EBF | Strong Enhancer              |                      | normal |
| chr8:11429919     |            |                 | Strong Enhancer              | Alu:SINE             | normal |
| chr8:11429946     |            |                 | Strong Enhancer              | Alu:SINE             | normal |
| rs9329246         |            |                 | Strong Enhancer              | Near Simple repeat   | normal |

All information retrieved is for the GM12878 lymphoblastoid cell line. The whole 1.2kb region shows evidence for conservation by having low probability of insertions and deletions, as defined by [Cons Indels MmCf \(consIndelsHgMmCanFam\) Track](#).
